# Supplementary material
Source: MDPI journal article supplement (https://www.mdpi.com/2673-7426/3/4/56)
Supplement: s1 [file s1]

Archive with 32 entries (32 files):
- Figure S1/Cor.A-770041.pdf
- Figure S1/Cor.BEZ235.pdf
- Figure S1/Cor.Bortezomib.pdf
- Figure S1/Cor.BX-795.pdf
- Figure S1/Cor.CGP-60474.pdf
- Figure S1/Cor.CP724714.pdf
- Figure S1/Cor.Dasatinib.pdf
- Figure S1/Cor.DMOG.pdf
- Figure S1/Cor.Epothilone B.pdf
- Figure S1/Cor.Midostaurin.pdf
- Figure S1/Cor.Pazopanib.pdf
- Figure S1/Cor.Temsirolimus.pdf
- Figure S1/Cor.TGX221.pdf
- Figure S1/Cor.WH-4-023.pdf
- Figure S1/durgSenstivity.A-770041.pdf
- Figure S1/durgSenstivity.BEZ235.pdf
- Figure S1/durgSenstivity.Bortezomib.pdf
- Figure S1/durgSenstivity.BX-795.pdf
- Figure S1/durgSenstivity.CGP-60474.pdf
- Figure S1/durgSenstivity.CP724714.pdf
- Figure S1/durgSenstivity.Dasatinib.pdf
- Figure S1/durgSenstivity.DMOG.pdf
- Figure S1/durgSenstivity.Epothilone B.pdf
- Figure S1/durgSenstivity.Midostaurin.pdf
- Figure S1/durgSenstivity.Pazopanib.pdf
- Figure S1/durgSenstivity.Temsirolimus.pdf
- Figure S1/durgSenstivity.TGX221.pdf
- Figure S1/durgSenstivity.WH-4-023.pdf
- Introduction of Supplementary Materials.pdf
- Table S1.xlsx
- Table S2.xlsx
- Table S3.xlsx
