# Supplementary material
Source: MDPI journal article supplement (https://www.mdpi.com/2673-7426/3/4/56)
Supplement: s1 [file s1 › Table S1.xlsx]

## Sheet: Sheet1
Target Detail	Target Rank	Target Score	miRNA Name	Gene Symbol	Expression in UCEC	P
Details	1	95	hsa-miR-144-3p	LRPPRC	No expression difference
Details	2	93	hsa-miR-4719	LRPPRC	No expression difference
Details	3	87	hsa-miR-6790-5p	LRPPRC	No expression difference
Details	4	87	hsa-miR-4658	LRPPRC	up-regulated	4.2557e-08
Details	5	86	hsa-miR-6074	LRPPRC	No expression difference
Details	6	85	hsa-miR-4698	LRPPRC	No expression difference
Details	7	85	hsa-miR-5011-5p	LRPPRC	No expression difference
Details	8	85	hsa-miR-6783-5p	LRPPRC	up-regulated	1.62448e-12
Details	9	84	hsa-miR-616-5p	LRPPRC	up-regulated	1.62437e-12
Details	10	84	hsa-miR-4666a-3p	LRPPRC	No expression difference
Details	11	84	hsa-miR-371b-5p	LRPPRC	No expression difference
Details	12	84	hsa-miR-373-5p	LRPPRC	No expression difference
Details	13	83	hsa-miR-7112-3p	LRPPRC	No expression difference
Details	14	83	hsa-miR-8063	LRPPRC	No expression difference
Details	15	81	hsa-miR-3163	LRPPRC	No expression difference
