# Supplementary material
Source: MDPI journal article supplement (https://www.mdpi.com/2673-7426/3/4/56)
Supplement: s1 [file s1 › Table S2.xlsx]

## Sheet: Worksheet
Interactor1	Category1	Species1	Interactor2	Category2	Species2	Score*	Expression in UCEC	P
hsa-miR-616-5p	miRNA	Homo sapiens	C1orf229	lncRNA	Homo sapiens	0.1619	No expression difference
hsa-miR-616-5p	miRNA	Homo sapiens	PELATON	lncRNA	Homo sapiens	0.1619	up-regulated	3.59087e-35
hsa-miR-616-5p	miRNA	Homo sapiens	LOC100652758	lncRNA	Homo sapiens	0.1619	No expression difference
hsa-miR-616-5p	miRNA	Homo sapiens	C3orf35	lncRNA	Homo sapiens	0.1619	No expression difference
hsa-miR-616-5p	miRNA	Homo sapiens	COL4A2-AS2	lncRNA	Homo sapiens	0.1619	No expression difference
hsa-miR-616-5p	miRNA	Homo sapiens	DLEU1	lncRNA	Homo sapiens	0.1519	up-regulated	2.44416e-07
hsa-miR-616-5p	miRNA	Homo sapiens	RAD51L3-RFFL	lncRNA	Homo sapiens	0.1519	No expression difference
hsa-miR-616-5p	miRNA	Homo sapiens	TSPEAR-AS2	lncRNA	Homo sapiens	0.1073	down-regulated	0.000196666
