# Supplementary material
Source: MDPI journal article supplement (https://www.mdpi.com/2673-7426/3/4/56)
Supplement: s1 [file s1 › Table S3.xlsx]

## Sheet: Worksheet
Interactor1	Category1	Species1	Interactor2	Category2	Species2	Score*	Expression in UCEC	P
hsa-miR-4658	miRNA	Homo sapiens	LINC01588	lncRNA	Homo sapiens	0.1619	No expression difference
hsa-mir-4658	miRNA	Homo sapiens	lnrCXCR4	lncRNA	Homo sapiens	1e-10	No expression difference
