# Supplementary material
Source: MDPI journal article supplement (https://www.mdpi.com/2673-7426/3/4/56)

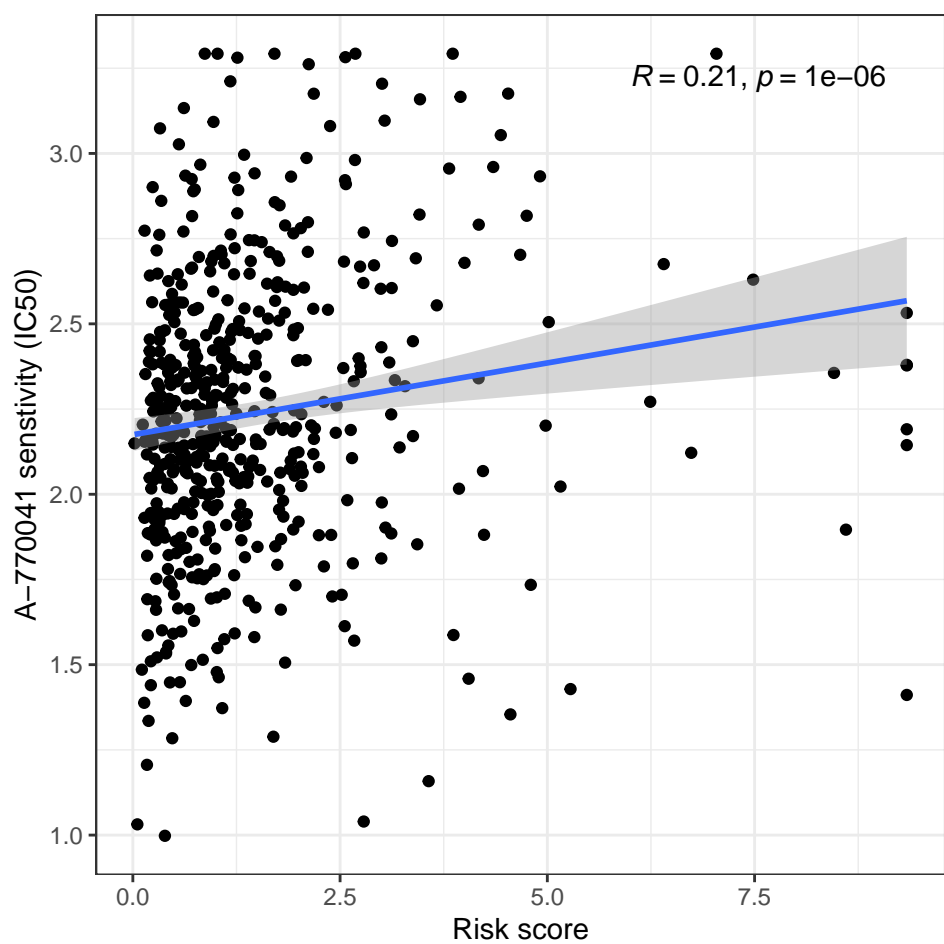

Supplement: s1 [file s1 › Figure S1/Cor.A-770041.pdf]

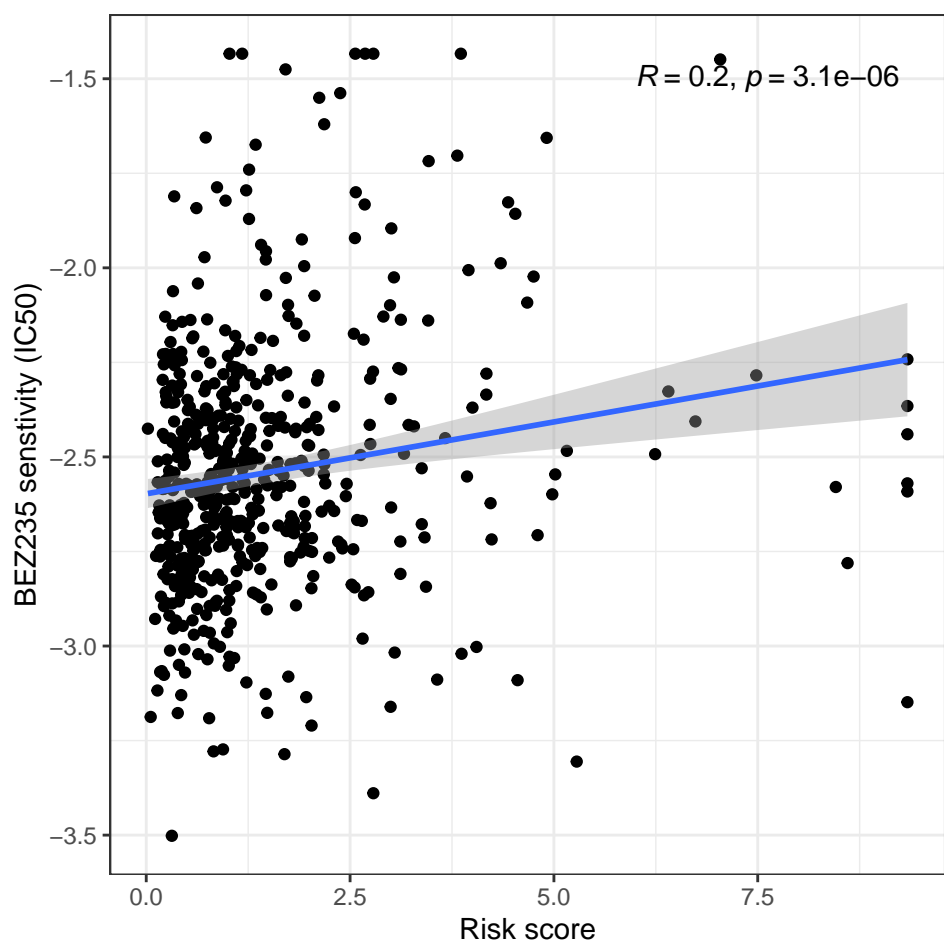

Supplement: s1 [file s1 › Figure S1/Cor.BEZ235.pdf]

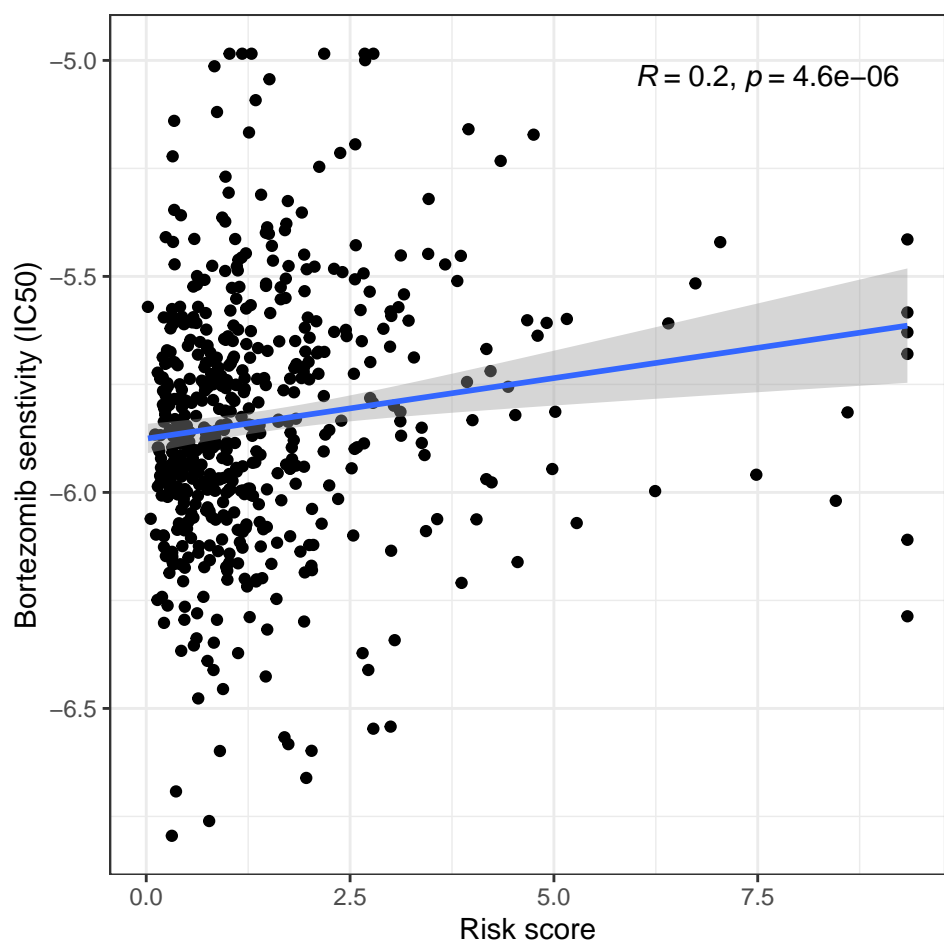

Supplement: s1 [file s1 › Figure S1/Cor.Bortezomib.pdf]

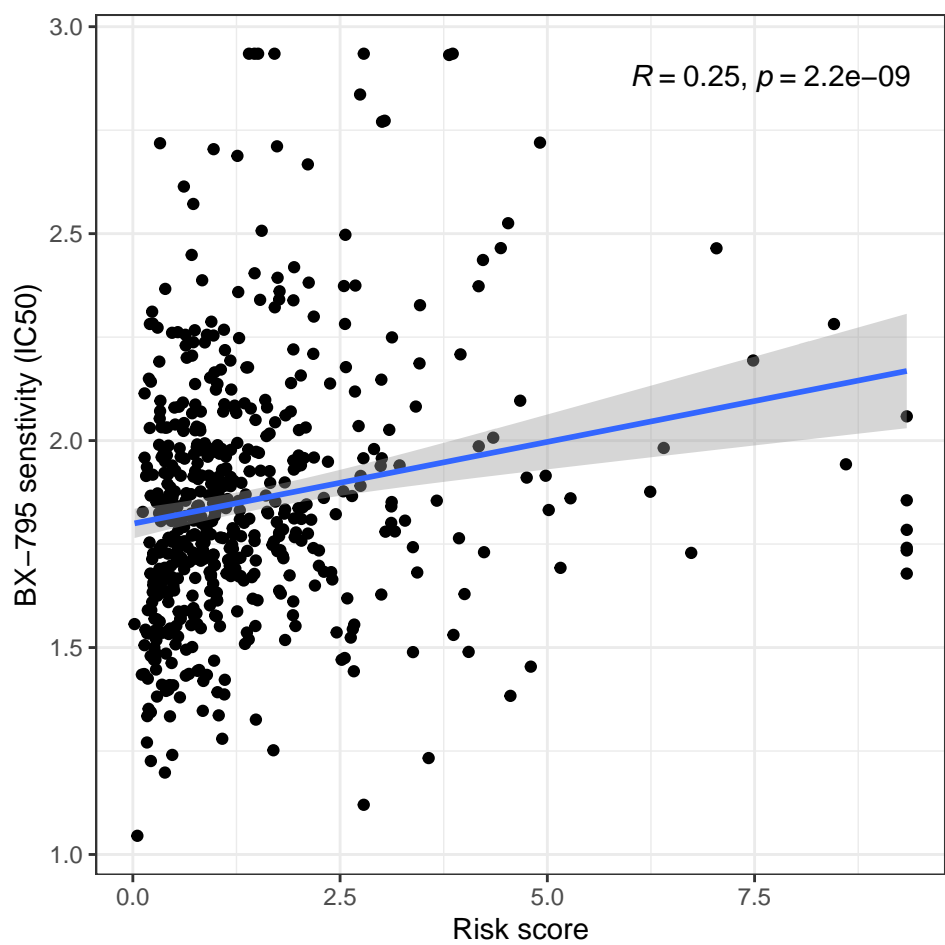

Supplement: s1 [file s1 › Figure S1/Cor.BX-795.pdf]

CGP-60474 sensitivity (IC50)

$R = 0.25, p = 2.1\text{e-}09$

Risk score

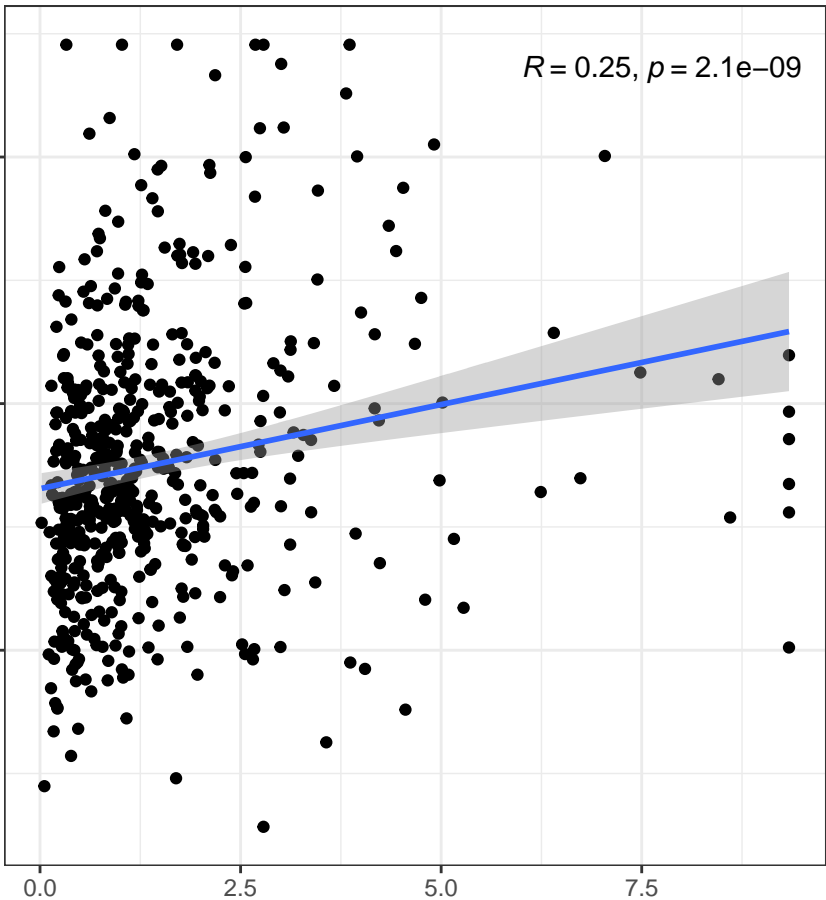

Supplement: s1 [file s1 › Figure S1/Cor.CGP-60474.pdf]

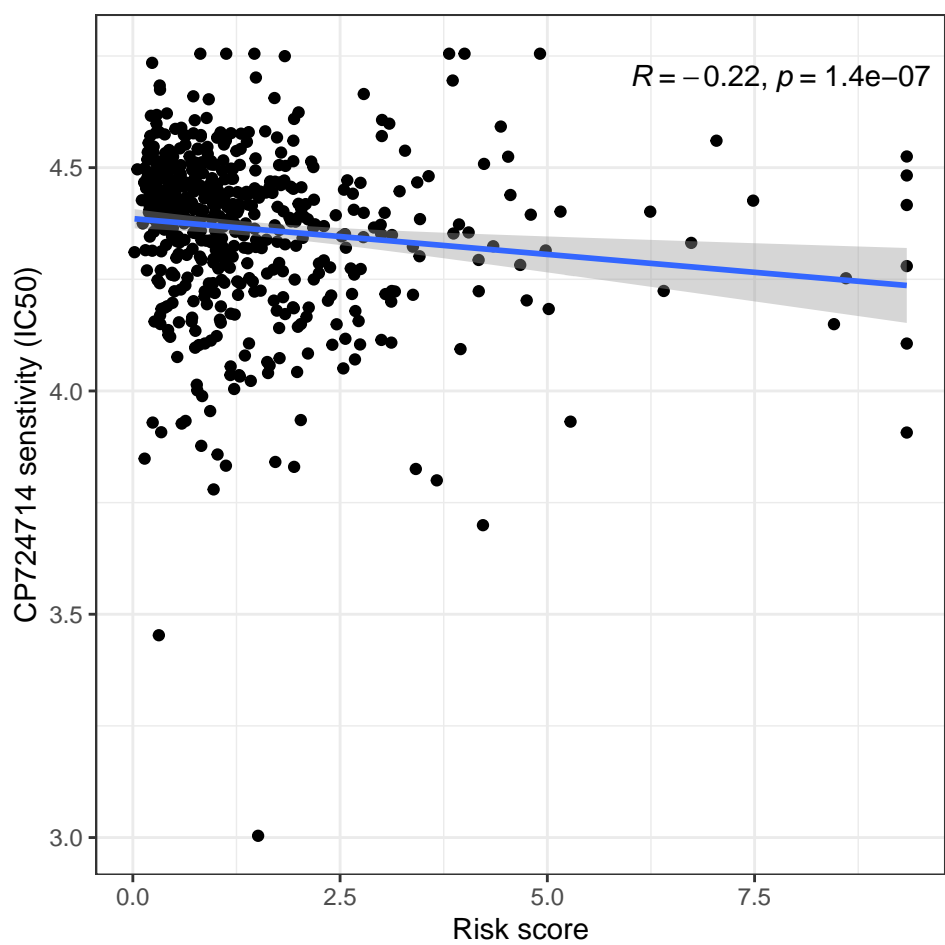

Supplement: s1 [file s1 › Figure S1/Cor.CP724714.pdf]

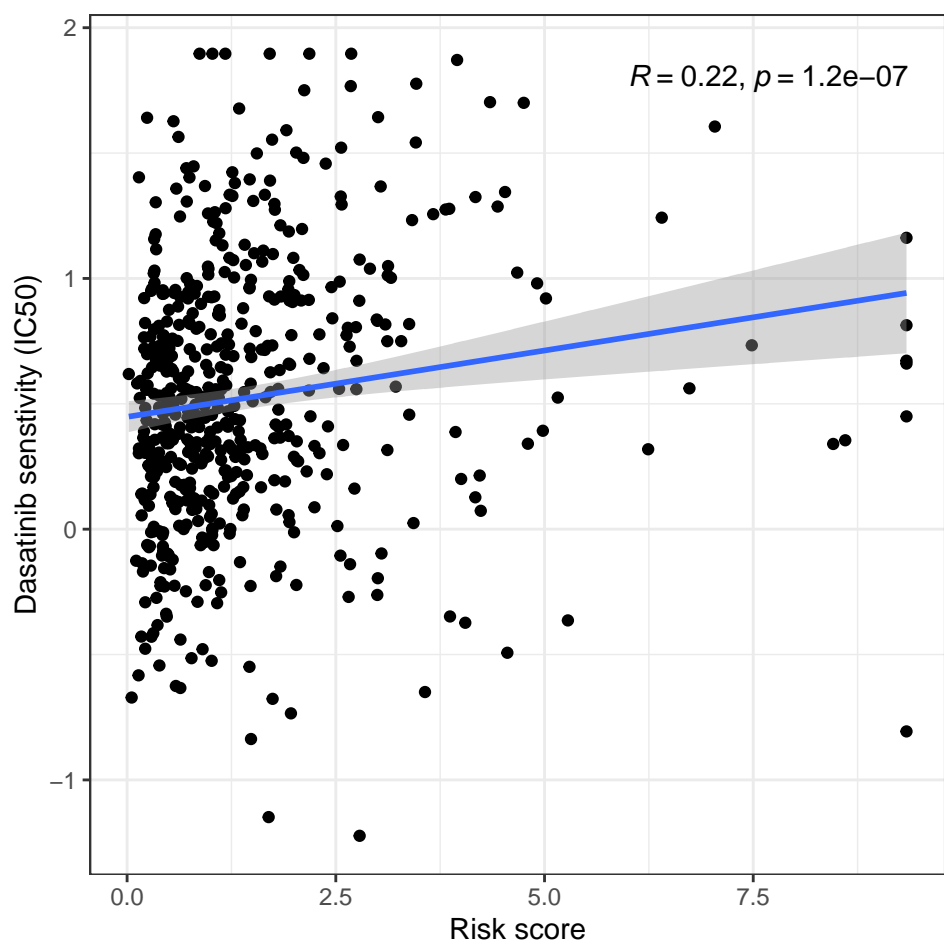

Supplement: s1 [file s1 › Figure S1/Cor.Dasatinib.pdf]

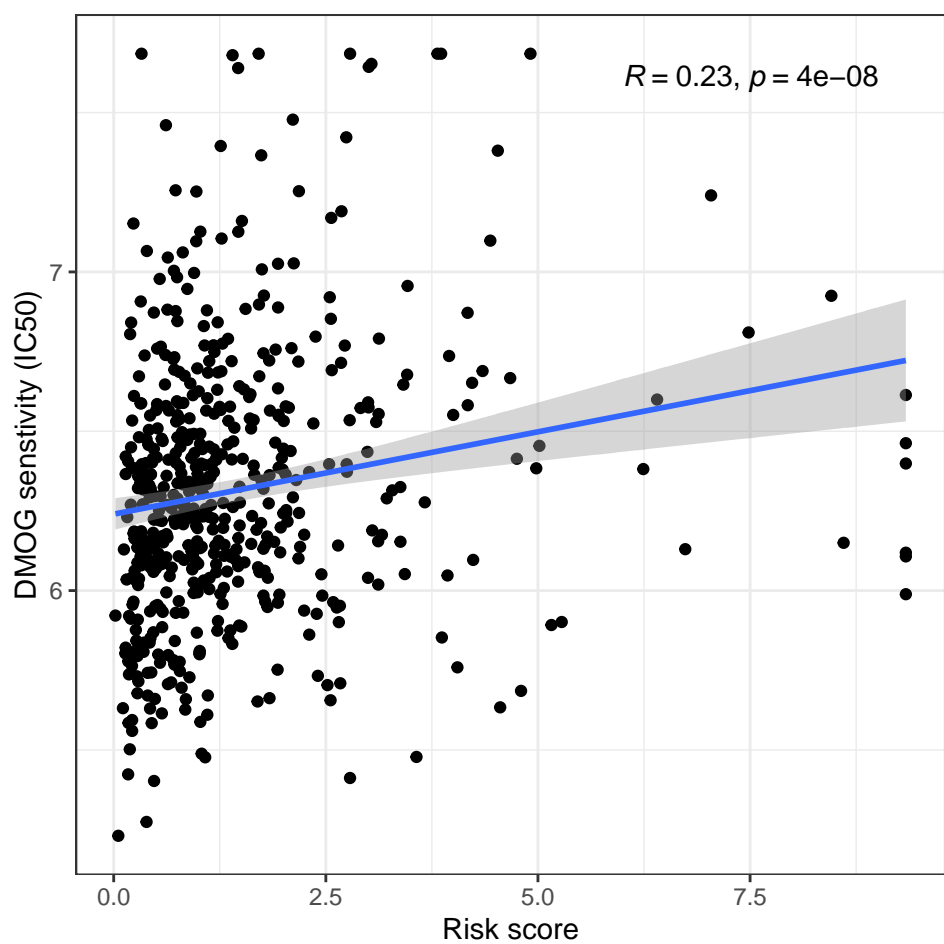

Supplement: s1 [file s1 › Figure S1/Cor.DMOG.pdf]

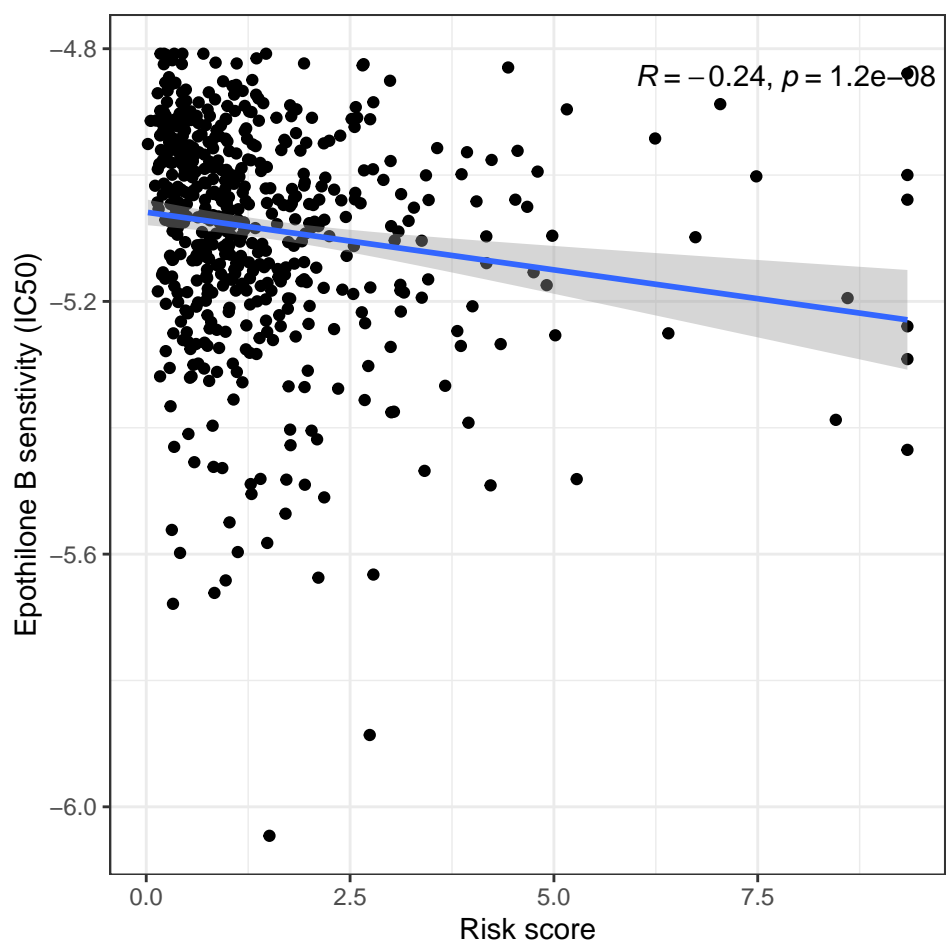

Supplement: s1 [file s1 › Figure S1/Cor.Epothilone B.pdf]

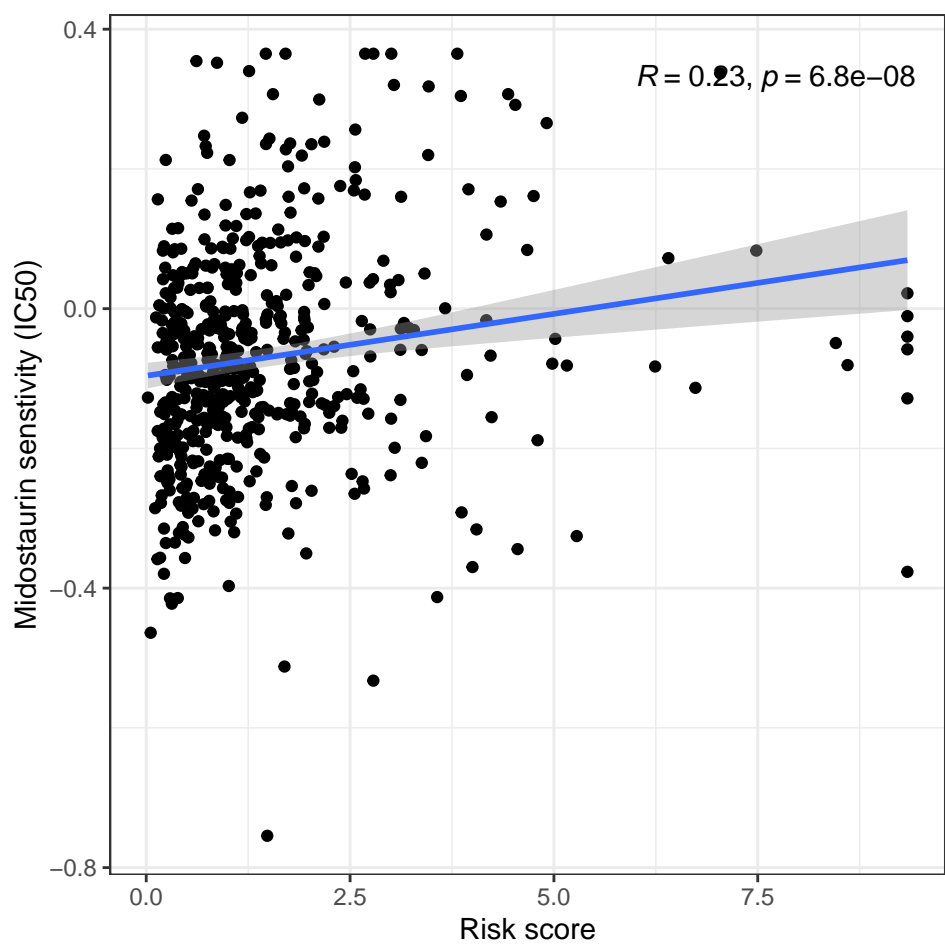

Supplement: s1 [file s1 › Figure S1/Cor.Midostaurin.pdf]

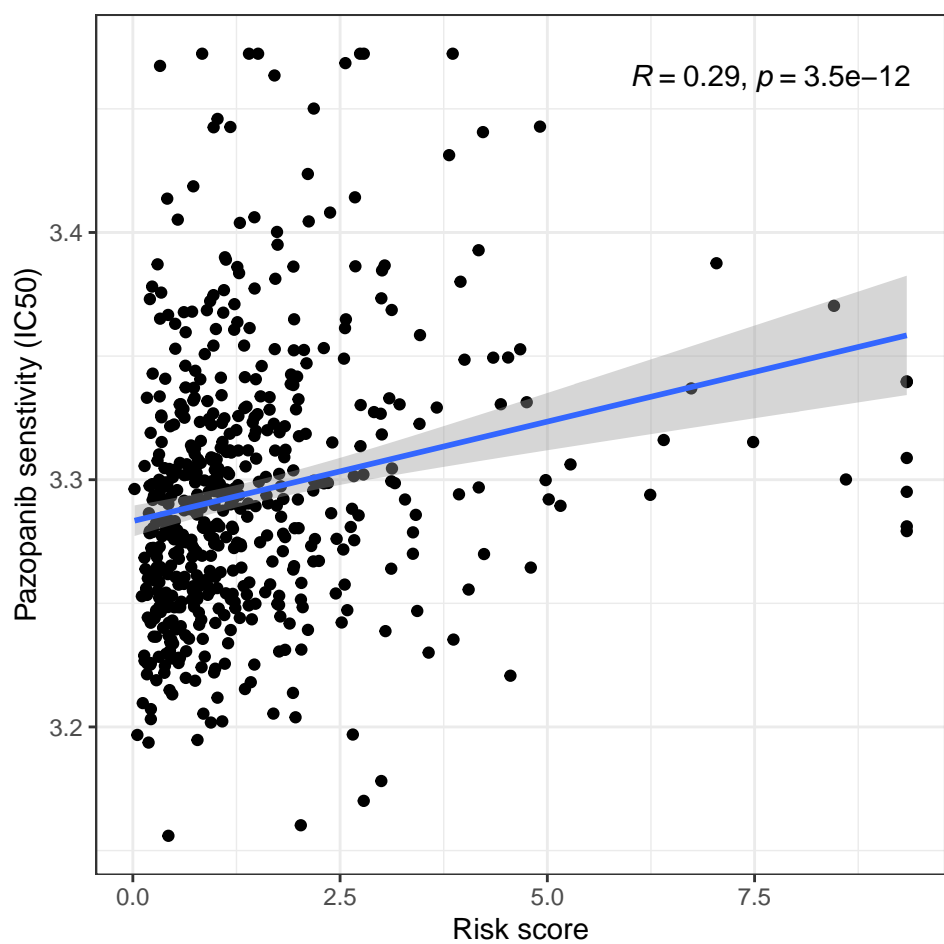

Supplement: s1 [file s1 › Figure S1/Cor.Pazopanib.pdf]

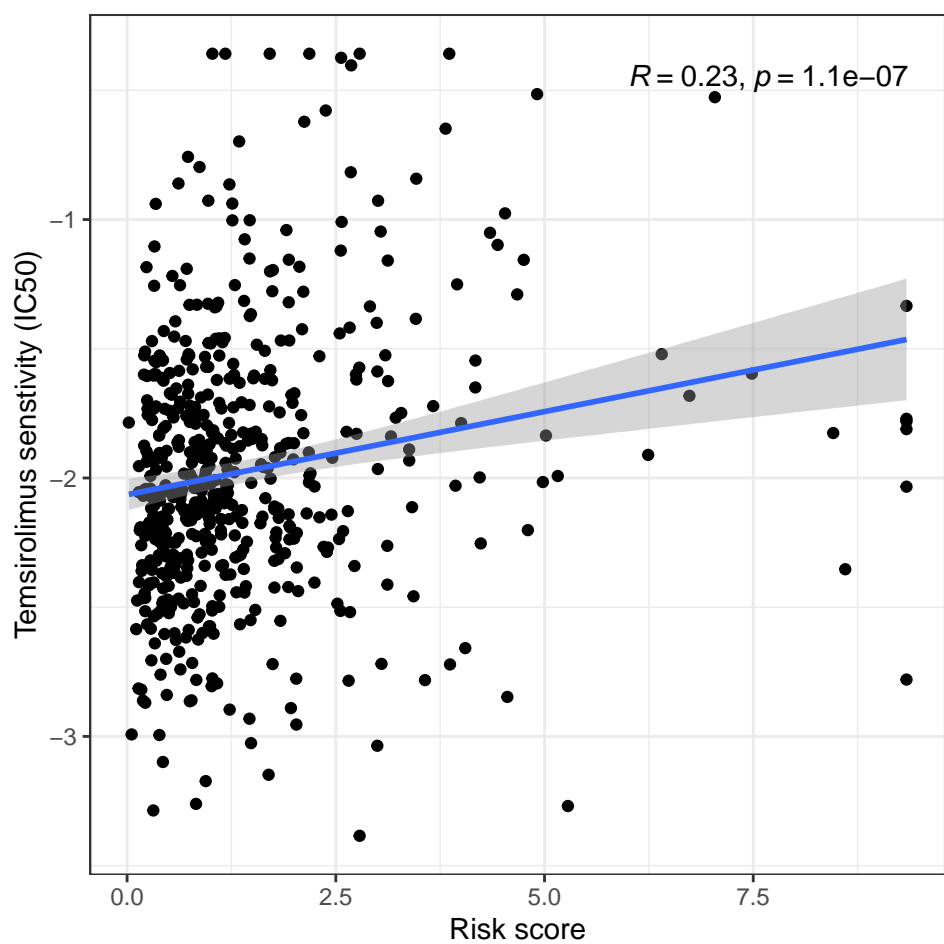

Supplement: s1 [file s1 › Figure S1/Cor.Temsirolimus.pdf]

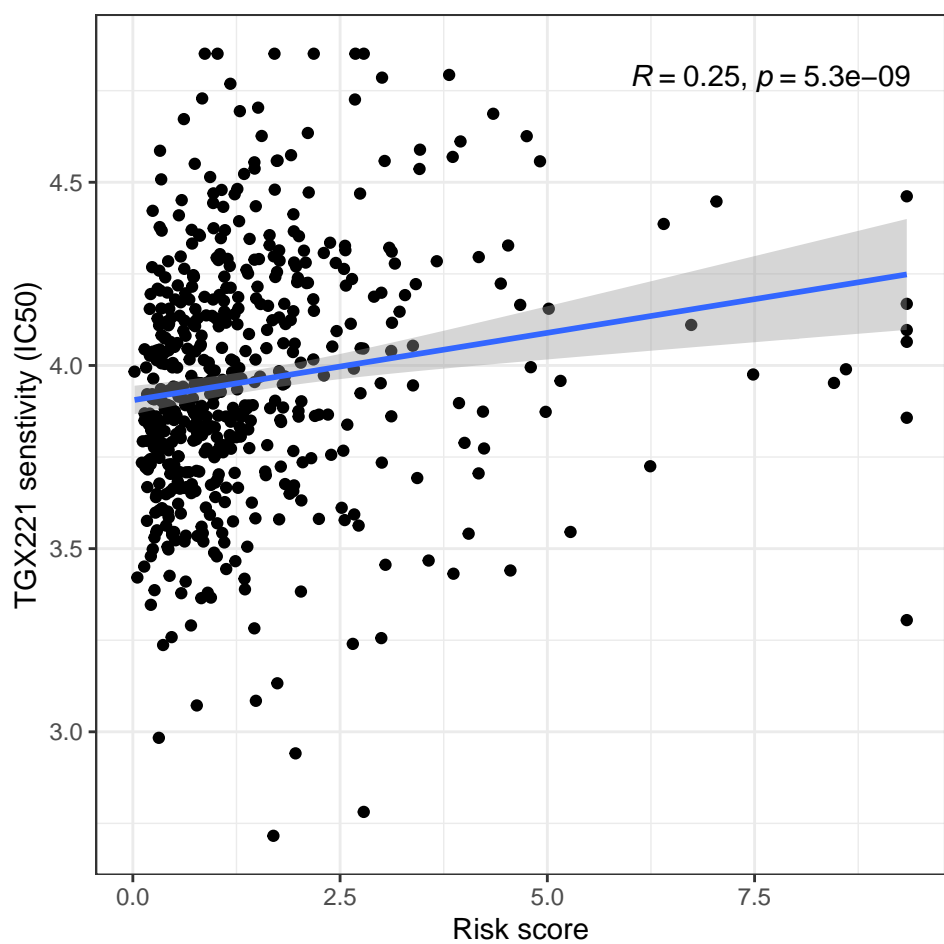

Supplement: s1 [file s1 › Figure S1/Cor.TGX221.pdf]

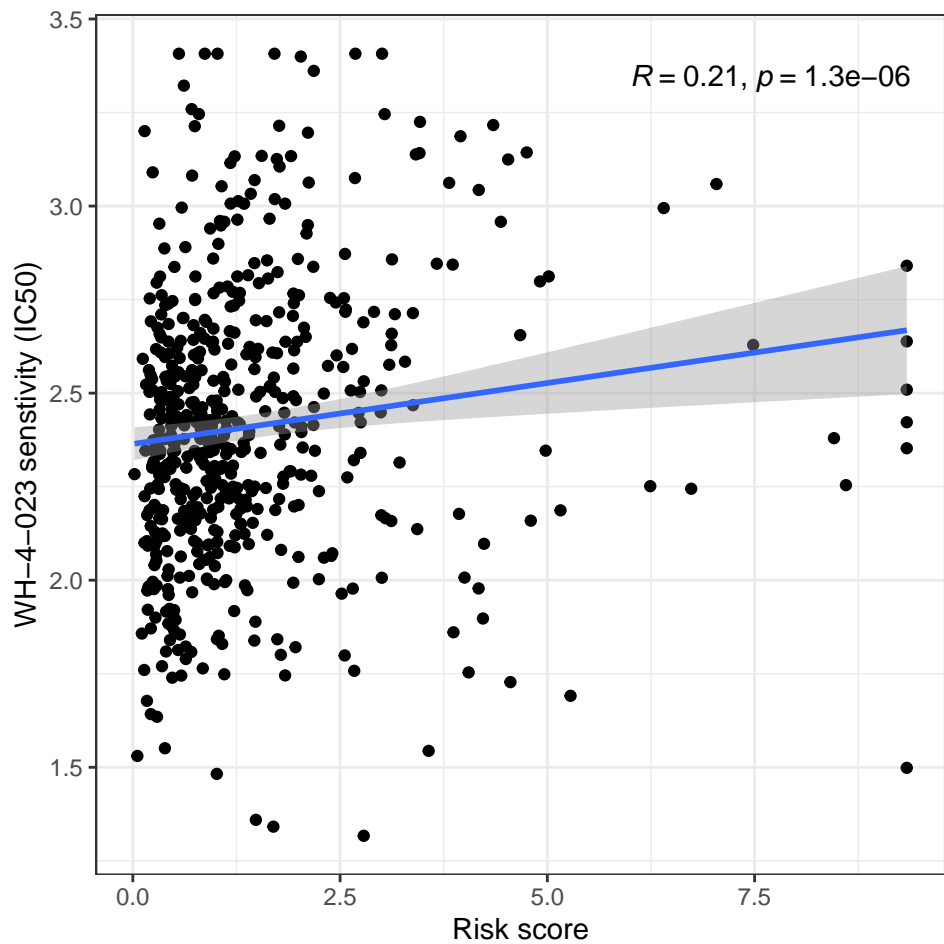

Supplement: s1 [file s1 › Figure S1/Cor.WH-4-023.pdf]

Risk 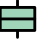 low 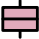 high

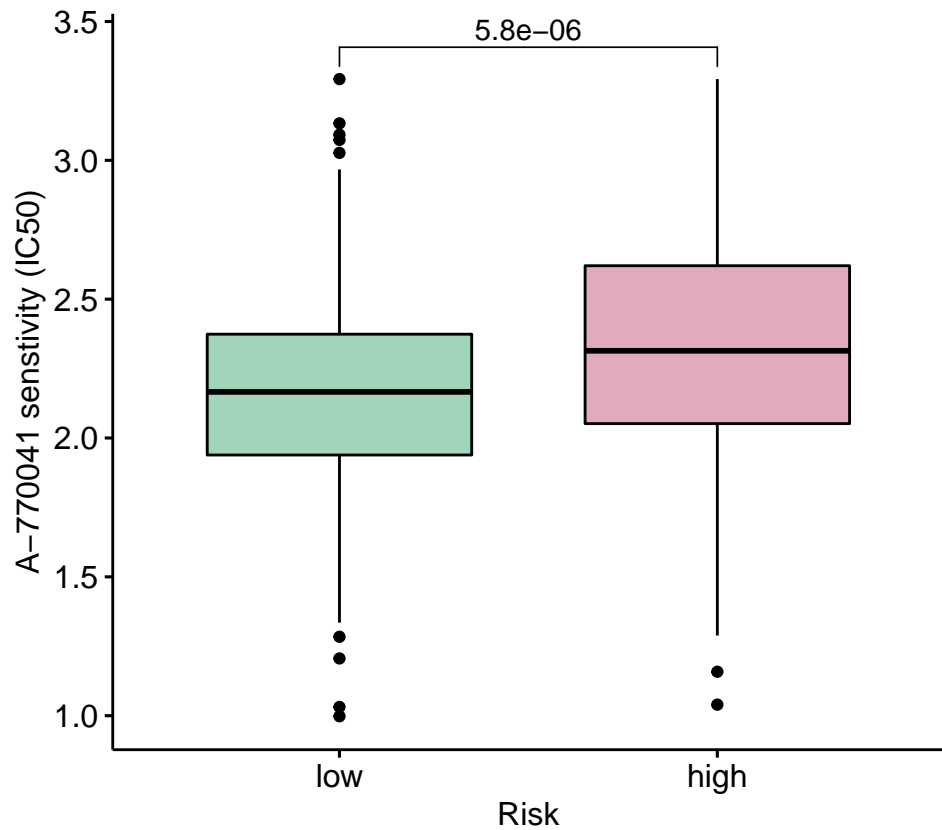

Supplement: s1 [file s1 › Figure S1/durgSenstivity.A-770041.pdf]

Risk 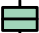 low 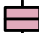 high

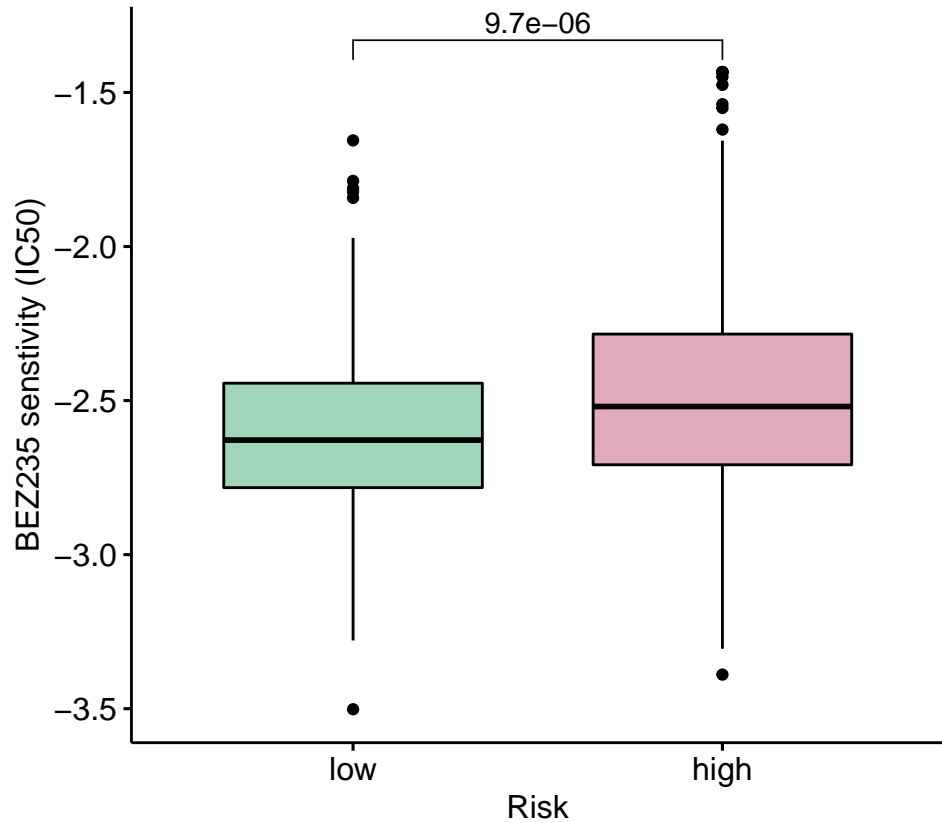

Supplement: s1 [file s1 › Figure S1/durgSenstivity.BEZ235.pdf]

Risk 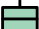 low 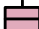 high

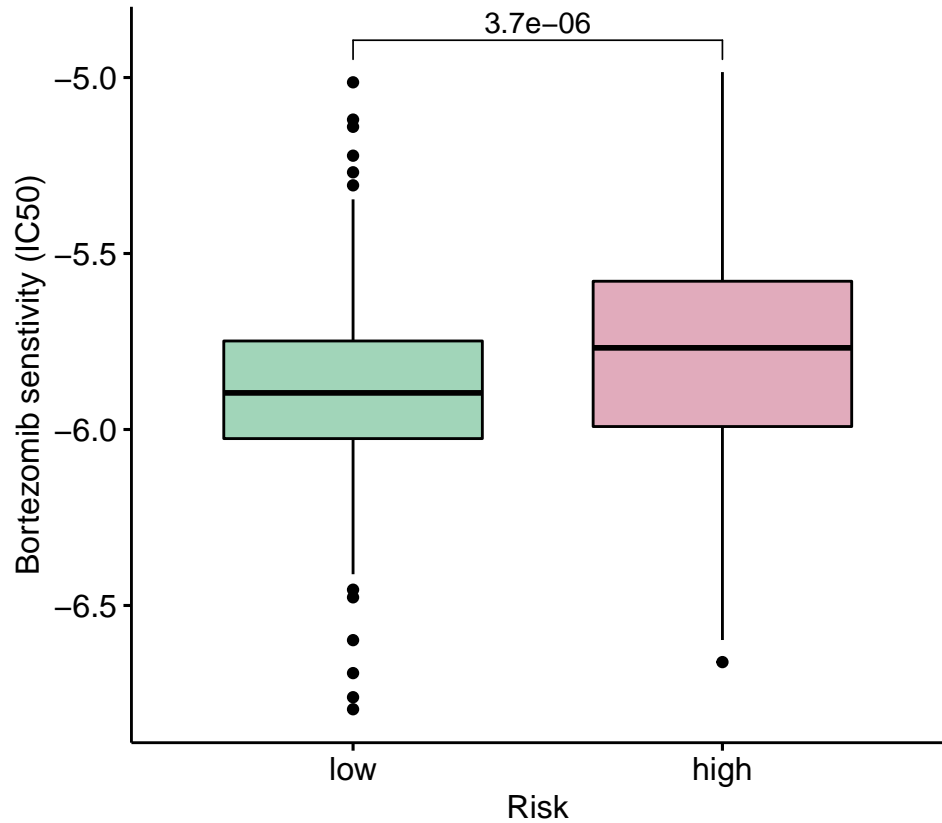

Supplement: s1 [file s1 › Figure S1/durgSenstivity.Bortezomib.pdf]

Risk 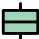 low 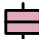 high

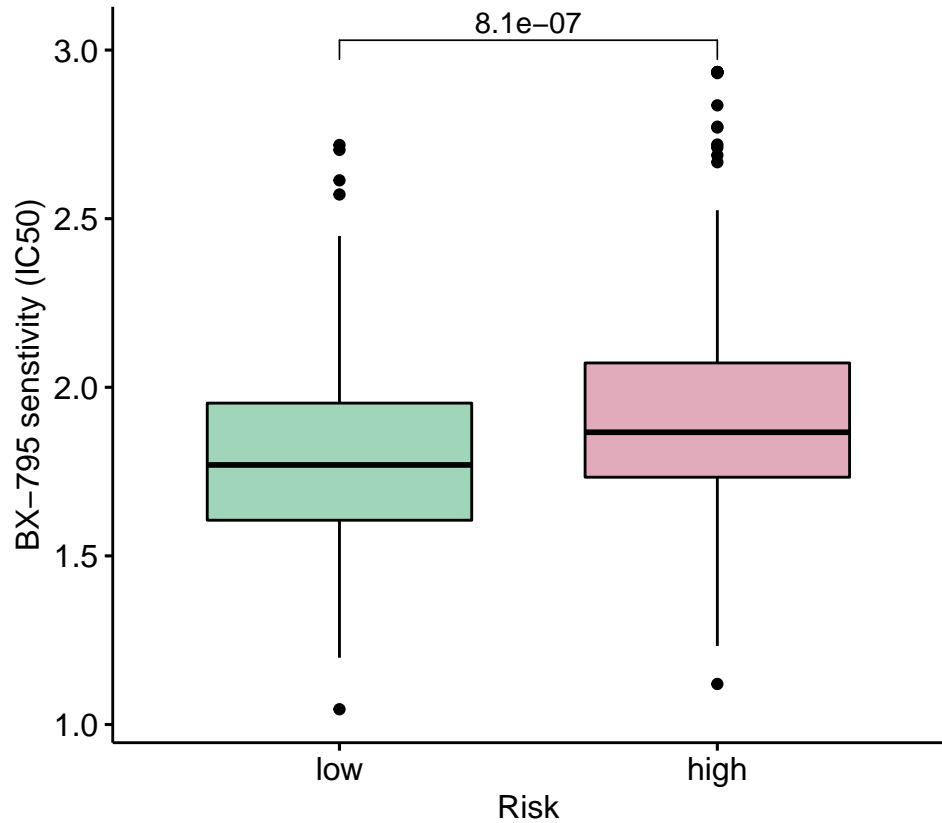

Supplement: s1 [file s1 › Figure S1/durgSenstivity.BX-795.pdf]

Risk 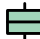 low 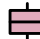 high

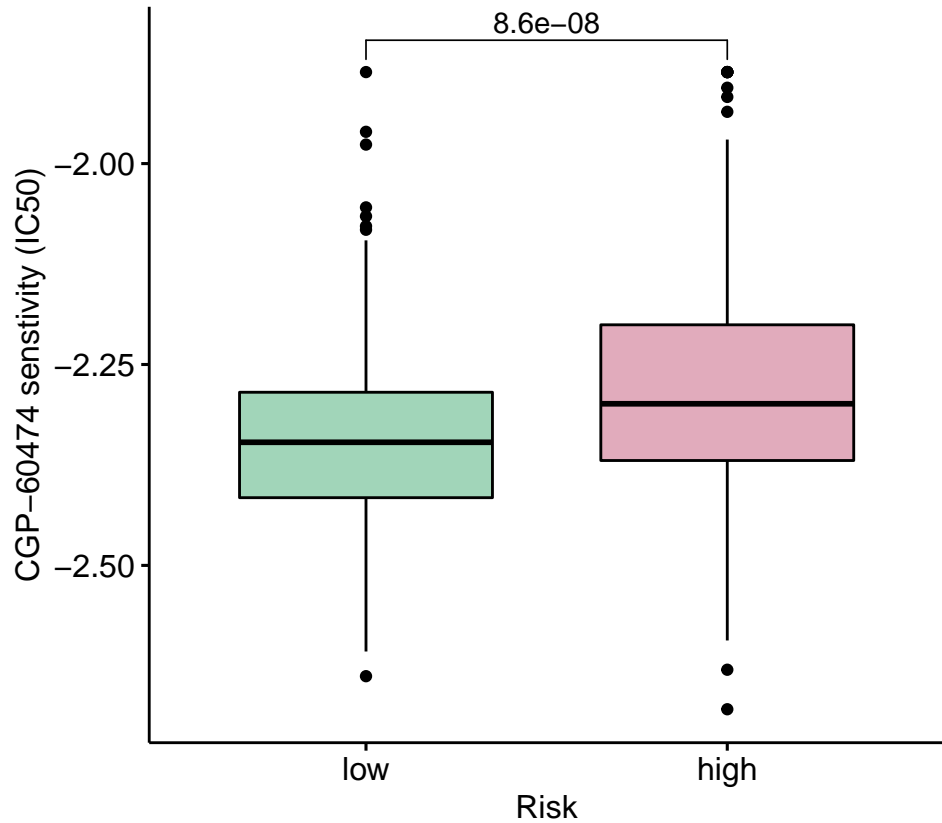

Supplement: s1 [file s1 › Figure S1/durgSenstivity.CGP-60474.pdf]

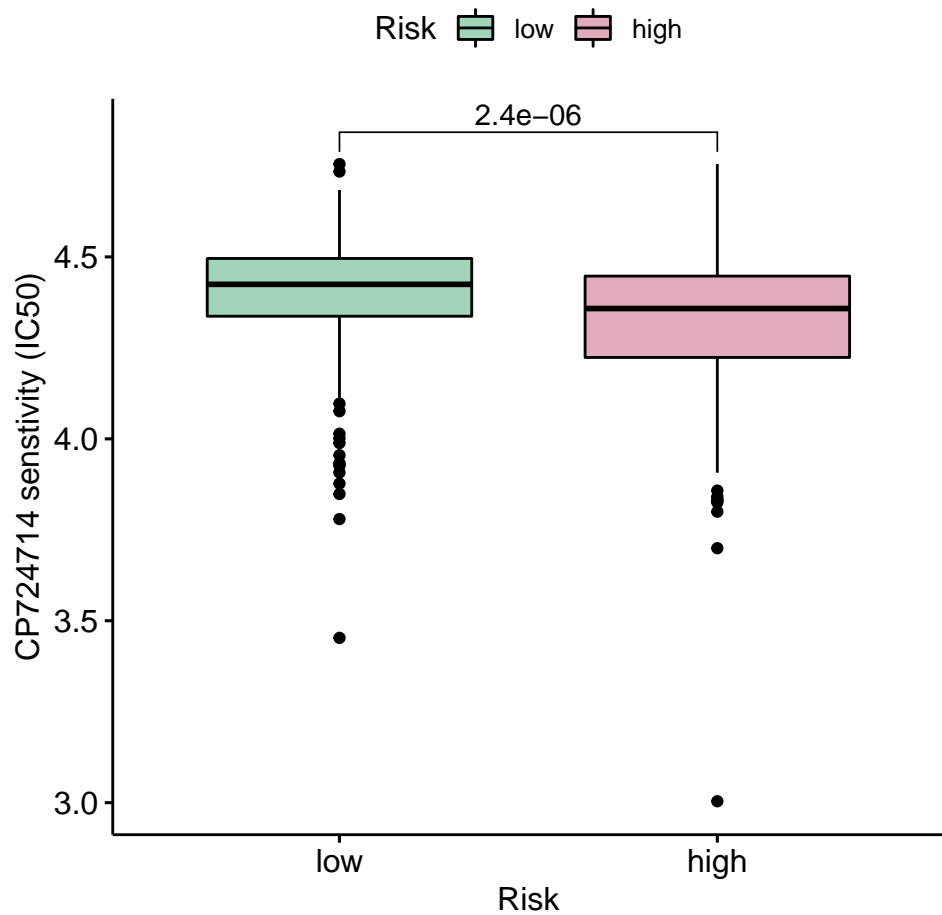

Supplement: s1 [file s1 › Figure S1/durgSenstivity.CP724714.pdf]

Dasatinib sensitivity (IC50)

Risk 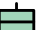 low 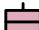 high

$3.3\text{e-}07$

low

high

Risk

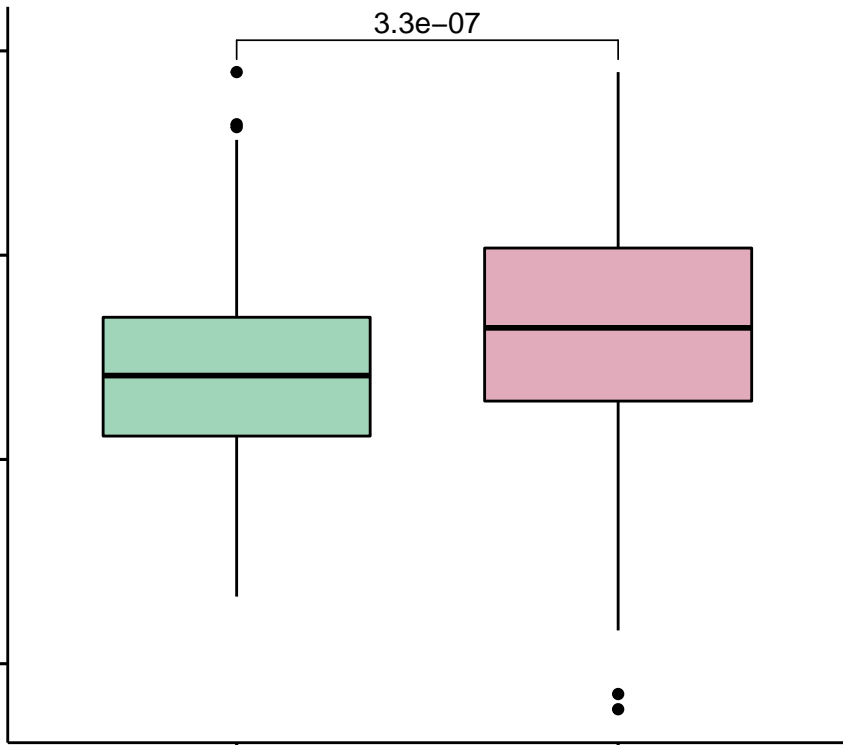

Supplement: s1 [file s1 › Figure S1/durgSenstivity.Dasatinib.pdf]

Risk 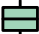 low 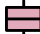 high

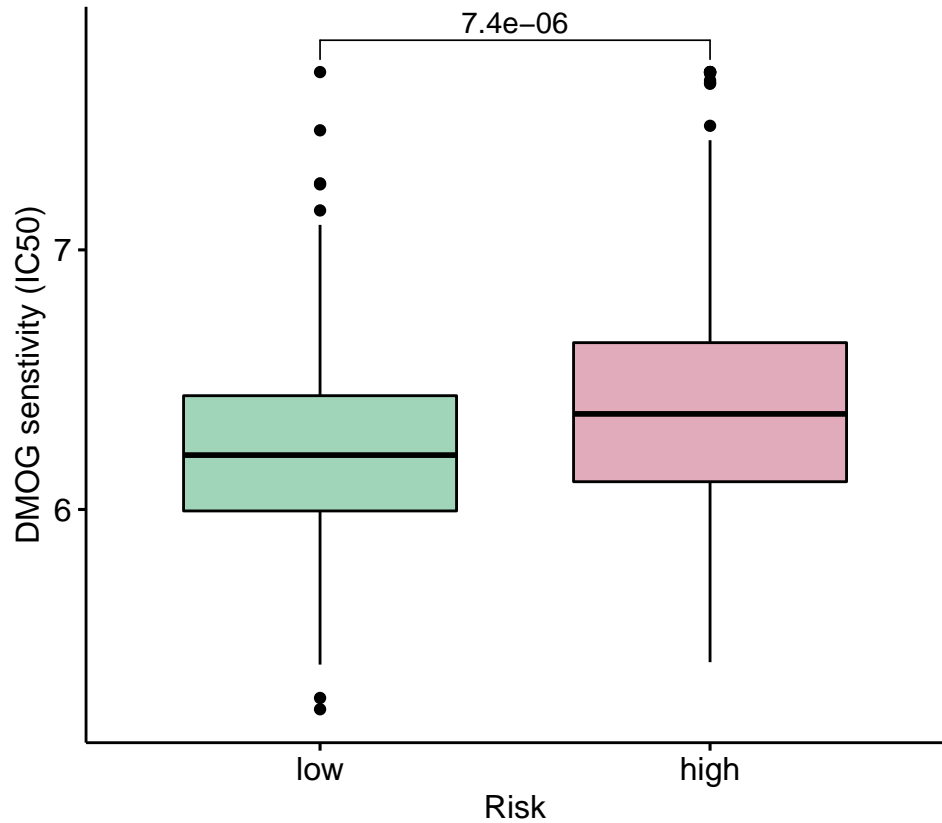

Supplement: s1 [file s1 › Figure S1/durgSenstivity.DMOG.pdf]

Risk  low  high

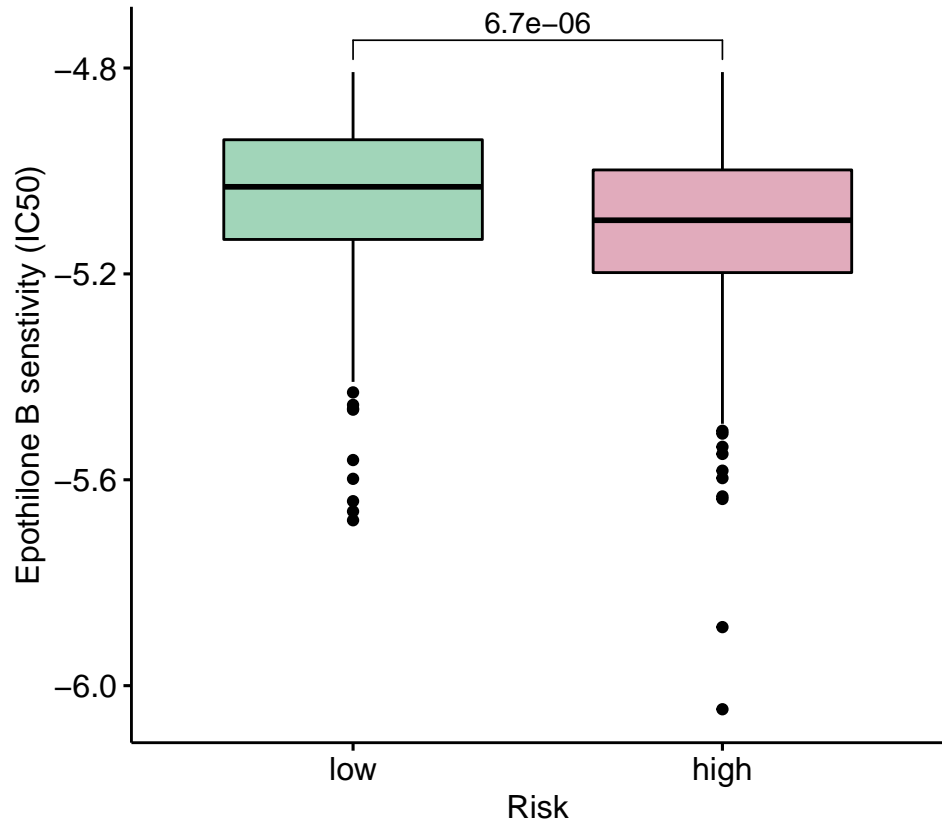

Supplement: s1 [file s1 › Figure S1/durgSenstivity.Epothilone B.pdf]

Midostaurin sensitivity (IC50)

Risk  low  high

$3.8e-07$

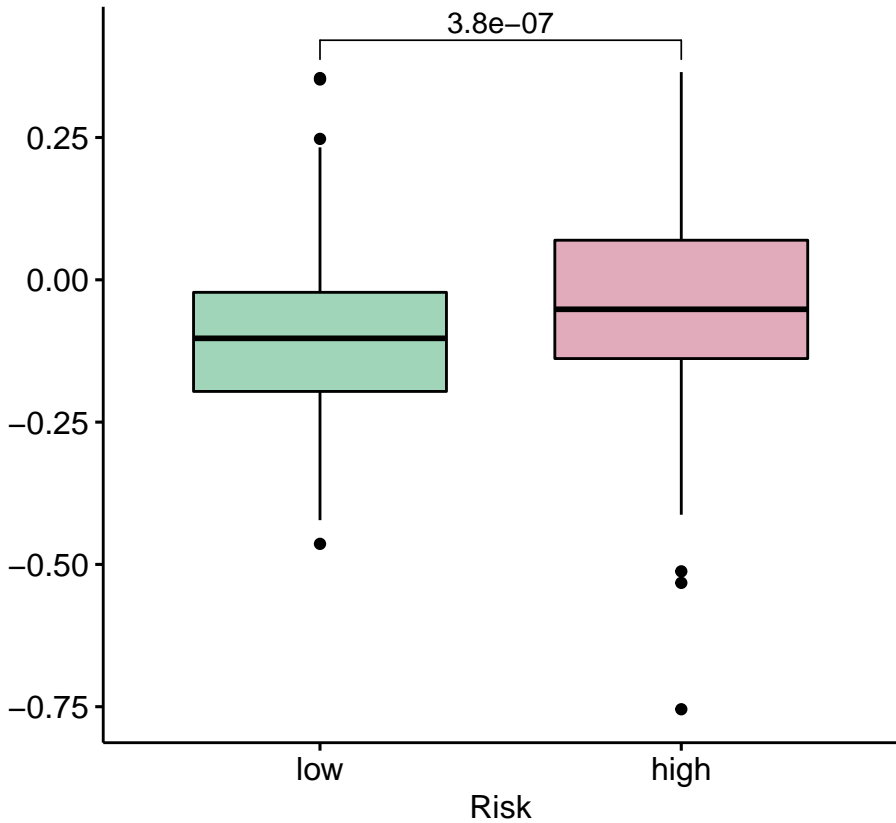

Supplement: s1 [file s1 › Figure S1/durgSenstivity.Midostaurin.pdf]

Risk  low  high

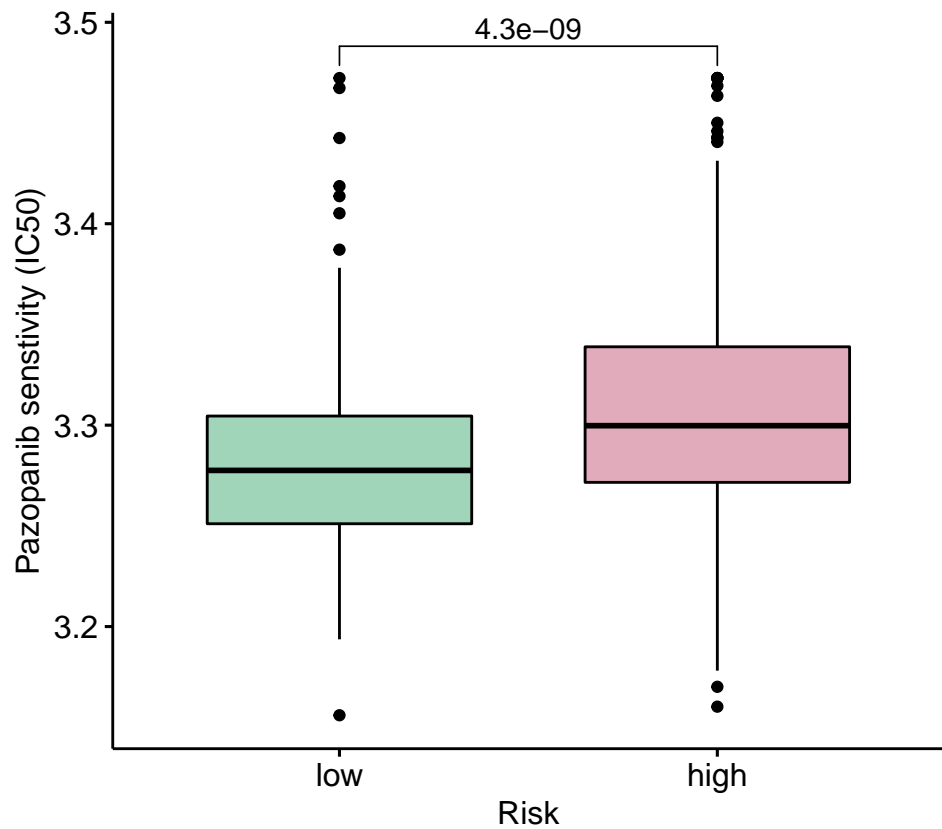

Supplement: s1 [file s1 › Figure S1/durgSenstivity.Pazopanib.pdf]

Risk 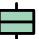 low  high

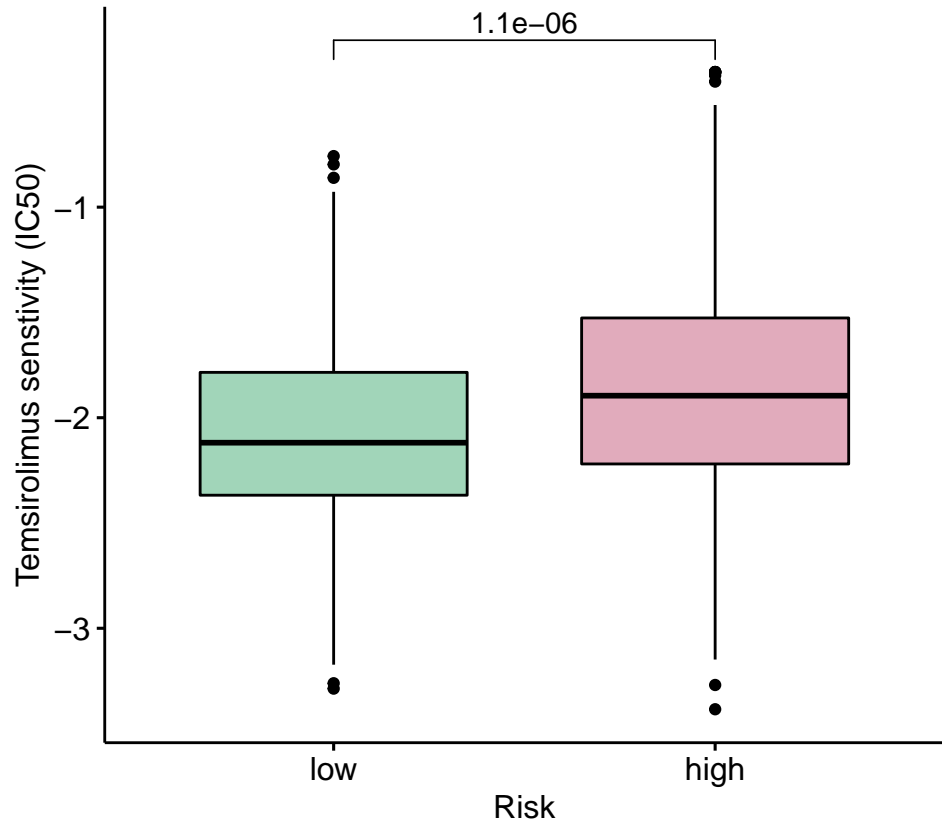

Supplement: s1 [file s1 › Figure S1/durgSenstivity.Temsirolimus.pdf]

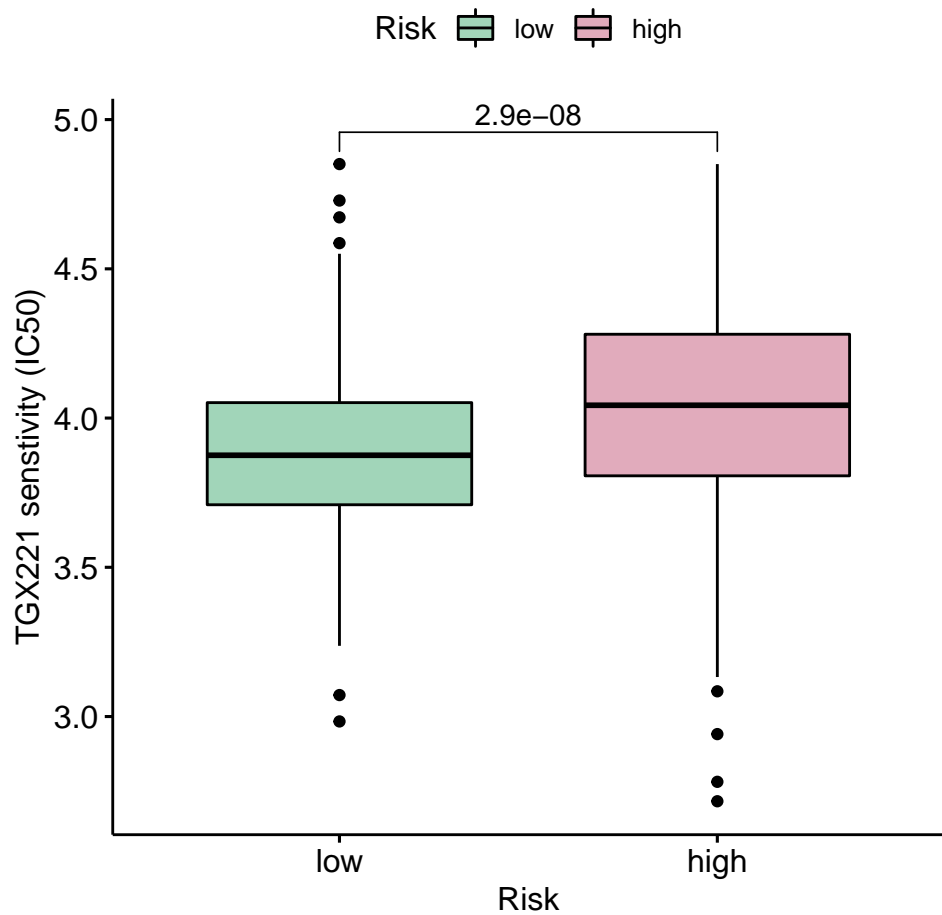

Supplement: s1 [file s1 › Figure S1/durgSenstivity.TGX221.pdf]

Risk  low  high

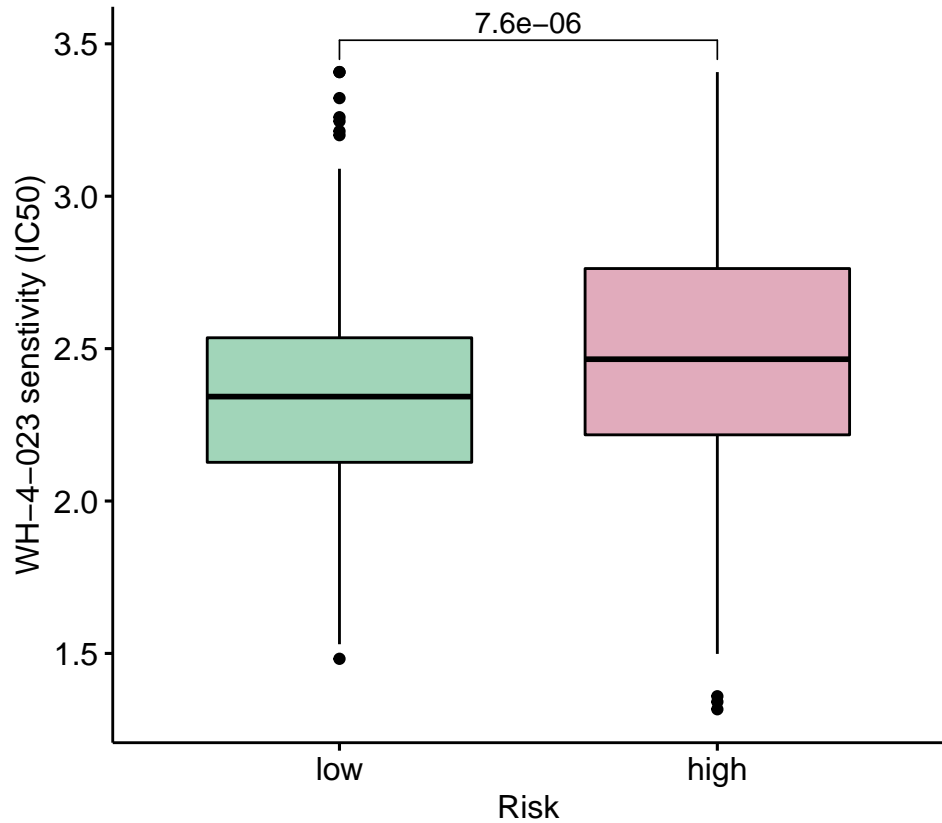

Supplement: s1 [file s1 › Figure S1/durgSenstivity.WH-4-023.pdf]
